# Supplementary material for: Displacement/Length Scaling Relationships for Normal Faults; a Review, Critique, and Revised Compilation
Source: Frontiers journal article supplement (doi:10.3389/feart.2022.907543), 2022-08-25
Supplement: Data_Sheet_2.XLSX [file Data_Sheet_2.XLSX]

## Sheet: Sheet1
Source	DOI/IBSN	Lithology	Value (GPa)	Data Type	Additional information on lithology (if available)	Notes			Carbonate	Evaporites	FG Clastic	Metamorphic	Sandstone	Volcanic	All Sedimentary		All Sed
Roche et al. 2013	https://doi.org/10.1002/jgrb.50279	Carbonate	44	Mean values				Averages	44.6505	23.3074	14.141	42.2604	24.6919	49.2896	23.6386		44
Santi et al. 2000	https://doi.org/10.2113/gseegeosci.6.4.333	Carbonate	32	Mean	Salem Limestone			Range	24-66	3.8-63.9	0.04-36.1	15.9-109.3	6.4-67.4	5.15-99.3			32
Santi et al. 2000	https://doi.org/10.2113/gseegeosci.6.4.334	Carbonate	43.98	Mean	Oneta Dolomite												43.98
Santi et al. 2000	https://doi.org/10.2113/gseegeosci.6.4.335	Carbonate	51.02	Mean	Lockport Dolomite												51.02
Santi et al. 2000	https://doi.org/10.2113/gseegeosci.6.4.336	Carbonate	66.25	Mean	Bonne Terra Dolomite												66.25
Santi et al. 2000	https://doi.org/10.2113/gseegeosci.6.4.337	Carbonate	28.54	Mean	Bedford Limestone												28.54
Santi et al. 2000	https://doi.org/10.2113/gseegeosci.6.4.338	Carbonate	55.84	Mean	Ozark Tavernelle Limestone												55.84
Santi et al. 2000	https://doi.org/10.2113/gseegeosci.6.4.339	Carbonate	63.84	Mean	Solenhofen Limestone												63.84
Hedtmann & Alber 2017	https://doi.org/10.1016/j.proeng.2017.05.163	Carbonate	24.7	Dry	Limestone												24.7
Hedtmann & Alber 2017	https://doi.org/10.1016/j.proeng.2017.05.163	Carbonate	31	Dry	Dolomite												31
Davarpanah et al 2020	Not available	Carbonate	31.36		Limestone	DOI not available. Can be found here: https://australiangeomechanics.org/papers/technical-note-determination-of-youngs-modulus-and-poissons-ratio-for-intact-stratified-rocks-and-their-relationship-with-uniaxial-compressive-strength/											31.36
Davarpanah et al 2020	Not available	Carbonate	31.99		Limestone	DOI not available. Can be found here: https://www.researchgate.net/profile/Ahmed-Alnuaim/publication/333022662_Unconfined_Compressive_Strength_and_Young's_Modulus_of_Riyadh_Limestone/links/5cd6ee3e299bf14d958d7da7/Unconfined-Compressive-Strength-and-Youngs-Modulus-of-Riyadh-Limestone.pdf											31.99
Davarpanah et al 2020	Not available	Carbonate	32.21		Limestone	DOI not available. Can be found here: https://www.researchgate.net/profile/Ahmed-Alnuaim/publication/333022662_Unconfined_Compressive_Strength_and_Young's_Modulus_of_Riyadh_Limestone/links/5cd6ee3e299bf14d958d7da7/Unconfined-Compressive-Strength-and-Youngs-Modulus-of-Riyadh-Limestone.pdf											32.21
Alnuaim et al., 2019	Not available	Carbonate	53.37		Limestone	DOI not available. Can be found here: https://www.researchgate.net/profile/Ahmed-Alnuaim/publication/333022662_Unconfined_Compressive_Strength_and_Young's_Modulus_of_Riyadh_Limestone/links/5cd6ee3e299bf14d958d7da7/Unconfined-Compressive-Strength-and-Youngs-Modulus-of-Riyadh-Limestone.pdf											53.37
Alnuaim et al., 2019	Not available	Carbonate	49.46		Limestone	DOI not available. Can be found here: https://www.researchgate.net/profile/Ahmed-Alnuaim/publication/333022662_Unconfined_Compressive_Strength_and_Young's_Modulus_of_Riyadh_Limestone/links/5cd6ee3e299bf14d958d7da7/Unconfined-Compressive-Strength-and-Youngs-Modulus-of-Riyadh-Limestone.pdf											49.46
Alnuaim et al., 2019	Not available	Carbonate	59.51		Limestone	DOI not available. Can be found here: https://www.researchgate.net/profile/Ahmed-Alnuaim/publication/333022662_Unconfined_Compressive_Strength_and_Young's_Modulus_of_Riyadh_Limestone/links/5cd6ee3e299bf14d958d7da7/Unconfined-Compressive-Strength-and-Youngs-Modulus-of-Riyadh-Limestone.pdf											59.51
Alnuaim et al., 2019	Not available	Carbonate	45.73		Limestone	DOI not available. Can be found here: https://www.researchgate.net/profile/Ahmed-Alnuaim/publication/333022662_Unconfined_Compressive_Strength_and_Young's_Modulus_of_Riyadh_Limestone/links/5cd6ee3e299bf14d958d7da7/Unconfined-Compressive-Strength-and-Youngs-Modulus-of-Riyadh-Limestone.pdf											45.73
Alnuaim et al., 2019	Not available	Carbonate	52.89		Limestone	DOI not available. Can be found here: https://www.researchgate.net/profile/Ahmed-Alnuaim/publication/333022662_Unconfined_Compressive_Strength_and_Young's_Modulus_of_Riyadh_Limestone/links/5cd6ee3e299bf14d958d7da7/Unconfined-Compressive-Strength-and-Youngs-Modulus-of-Riyadh-Limestone.pdf											52.89
Alnuaim et al., 2019	Not available	Carbonate	48.91		Limestone	DOI not available. Can be found here: https://www.researchgate.net/profile/Ahmed-Alnuaim/publication/333022662_Unconfined_Compressive_Strength_and_Young's_Modulus_of_Riyadh_Limestone/links/5cd6ee3e299bf14d958d7da7/Unconfined-Compressive-Strength-and-Youngs-Modulus-of-Riyadh-Limestone.pdf											48.91
Alnuaim et al., 2019	Not available	Carbonate	51.53		Limestone	DOI not available. Can be found here: https://www.researchgate.net/profile/Ahmed-Alnuaim/publication/333022662_Unconfined_Compressive_Strength_and_Young's_Modulus_of_Riyadh_Limestone/links/5cd6ee3e299bf14d958d7da7/Unconfined-Compressive-Strength-and-Youngs-Modulus-of-Riyadh-Limestone.pdf											51.53
Alnuaim et al., 2019	Not available	Carbonate	52.46		Limestone	DOI not available. Can be found here: https://www.researchgate.net/profile/Ahmed-Alnuaim/publication/333022662_Unconfined_Compressive_Strength_and_Young's_Modulus_of_Riyadh_Limestone/links/5cd6ee3e299bf14d958d7da7/Unconfined-Compressive-Strength-and-Youngs-Modulus-of-Riyadh-Limestone.pdf											52.46
Davarpanah et al 2020	Not available	Carbonate	31.72		Limestone	DOI not available. Can be found here: https://australiangeomechanics.org/papers/technical-note-determination-of-youngs-modulus-and-poissons-ratio-for-intact-stratified-rocks-and-their-relationship-with-uniaxial-compressive-strength/											31.72
Malkowski et al. 2018	https://doi.org/10.1016/j.jsm.2018.07.002	FG Clastic	13.44	Average													13.44
Roche et al. 2013	https://doi.org/10.1002/jgrb.50279	FG Clastic	14	Mean values													14
Bell, 2000	0632052058 9780632052059	FG Clastic	25		Mudstone												25
Bell, 2000	0632052058 9780632052059	FG Clastic	45		Siltstone												45
Bell, 2000	0632052058 9780632052059	FG Clastic	5.2		Shale												5.2
Santi et al. 2000	https://doi.org/10.2113/gseegeosci.6.4.339	FG Clastic	26.27	Mean	Hackensack Siltstone												26.27
Xu et al 2016	https://doi.org/10.1155/2016/5967159	FG Clastic	23.82	Average	Mudstone												23.82
Dobson & Houseworth 2013	Not available	FG Clastic	0.35		Boom Clay	DOI not available. Can be found here: https://www.osti.gov/servlets/purl/1131032											0.35
Dobson & Houseworth 2013		FG Clastic	0.1		Oxford Clay	DOI not available. Can be found here: https://www.osti.gov/servlets/purl/1131033											0.1
Dobson & Houseworth 2013		FG Clastic	0.042		Ypresian Clay	DOI not available. Can be found here: https://www.osti.gov/servlets/purl/1131034											0.042
Dobson & Houseworth 2013		FG Clastic	4		Opalinus Clay (Mont Terri)	DOI not available. Can be found here: https://www.osti.gov/servlets/purl/1131035											4
Dobson & Houseworth 2013		FG Clastic	4		Callovo-Oxfordian Clay	DOI not available. Can be found here: https://www.osti.gov/servlets/purl/1131036											4
Dobson & Houseworth 2013		FG Clastic	5		Opalinus Clay (Zurich Weinland)	DOI not available. Can be found here: https://www.osti.gov/servlets/purl/1131037											5
Dobson & Houseworth 2013		FG Clastic	7		Tournemire Argillite	DOI not available. Can be found here: https://www.osti.gov/servlets/purl/1131038											7
Dobson & Houseworth 2013		FG Clastic	0.3		Mo Clay	DOI not available. Can be found here: https://www.osti.gov/servlets/purl/1131039											0.3
Dobson & Houseworth 2013		FG Clastic	4.3		Antrim Shale (parallel to bedding)	DOI not available. Can be found here: https://www.osti.gov/servlets/purl/1131040											4.3
Dobson & Houseworth 2013		FG Clastic	7.3		Eagle Ford Shale (parallel to bedding)	DOI not available. Can be found here: https://www.osti.gov/servlets/purl/1131041											7.3
Dobson & Houseworth 2013		FG Clastic	5.7		Marcellus Shale (parallel to bedding)	DOI not available. Can be found here: https://www.osti.gov/servlets/purl/1131042											5.7
Dobson & Houseworth 2013		FG Clastic	8		Woodford Shale (parallel to bedding)	DOI not available. Can be found here: https://www.osti.gov/servlets/purl/1131043											8
Dobson & Houseworth 2013		FG Clastic	10.4		Monterey Shale (parallel to bedding)	DOI not available. Can be found here: https://www.osti.gov/servlets/purl/1131044											10.4
Dobson & Houseworth 2013		FG Clastic	11		Antrim Shale (perp to bedding)	DOI not available. Can be found here: https://www.osti.gov/servlets/purl/1131045											11
Dobson & Houseworth 2013		FG Clastic	15		Eagle Ford Shale (perp to bedding)	DOI not available. Can be found here: https://www.osti.gov/servlets/purl/1131046											15
Dobson & Houseworth 2013		FG Clastic	17		Marcellus Shale (perp to bedding)	DOI not available. Can be found here: https://www.osti.gov/servlets/purl/1131047											17
Dobson & Houseworth 2013		FG Clastic	23		Woodford Shale (perp to bedding)	DOI not available. Can be found here: https://www.osti.gov/servlets/purl/1131048											23
Dobson & Houseworth 2013		FG Clastic	15		Monterey Shale (perp to bedding)	DOI not available. Can be found here: https://www.osti.gov/servlets/purl/1131049											15
Davarpanah et al 2020	Not available	FG Clastic	25.96		Siltstone	DOI not available. Can be found here: https://australiangeomechanics.org/papers/technical-note-determination-of-youngs-modulus-and-poissons-ratio-for-intact-stratified-rocks-and-their-relationship-with-uniaxial-compressive-strength/											25.96
Davarpanah et al 2020	Not available	FG Clastic	36.93		Siltstone	DOI not available. Can be found here: https://australiangeomechanics.org/papers/technical-note-determination-of-youngs-modulus-and-poissons-ratio-for-intact-stratified-rocks-and-their-relationship-with-uniaxial-compressive-strength/											36.93
Davarpanah et al 2020	Not available	FG Clastic	26.07		Siltstone	DOI not available. Can be found here: https://australiangeomechanics.org/papers/technical-note-determination-of-youngs-modulus-and-poissons-ratio-for-intact-stratified-rocks-and-their-relationship-with-uniaxial-compressive-strength/											26.07
Davarpanah et al 2020	Not available	FG Clastic	24.46		Siltstone	DOI not available. Can be found here: https://australiangeomechanics.org/papers/technical-note-determination-of-youngs-modulus-and-poissons-ratio-for-intact-stratified-rocks-and-their-relationship-with-uniaxial-compressive-strength/											24.46
Davarpanah et al 2020	Not available	FG Clastic	2.5		Highly weathered siltstone	DOI not available. Can be found here: https://australiangeomechanics.org/papers/technical-note-determination-of-youngs-modulus-and-poissons-ratio-for-intact-stratified-rocks-and-their-relationship-with-uniaxial-compressive-strength/											2.5
Davarpanah et al 2020	Not available	FG Clastic	4.33		Highly weathered siltstone	DOI not available. Can be found here: https://australiangeomechanics.org/papers/technical-note-determination-of-youngs-modulus-and-poissons-ratio-for-intact-stratified-rocks-and-their-relationship-with-uniaxial-compressive-strength/											4.33
Davarpanah et al 2020	Not available	FG Clastic	6.99		Highly weathered siltstone	DOI not available. Can be found here: https://australiangeomechanics.org/papers/technical-note-determination-of-youngs-modulus-and-poissons-ratio-for-intact-stratified-rocks-and-their-relationship-with-uniaxial-compressive-strength/											6.99
Davarpanah et al 2020	Not available	FG Clastic	13.06		Highly weathered siltstone	DOI not available. Can be found here: https://australiangeomechanics.org/papers/technical-note-determination-of-youngs-modulus-and-poissons-ratio-for-intact-stratified-rocks-and-their-relationship-with-uniaxial-compressive-strength/											13.06
Davarpanah et al 2020	Not available	FG Clastic	28.55		Siltstone	DOI not available. Can be found here: https://australiangeomechanics.org/papers/technical-note-determination-of-youngs-modulus-and-poissons-ratio-for-intact-stratified-rocks-and-their-relationship-with-uniaxial-compressive-strength/											28.55
Davarpanah et al 2020	Not available	FG Clastic	2.65		Siltstone	DOI not available. Can be found here: https://australiangeomechanics.org/papers/technical-note-determination-of-youngs-modulus-and-poissons-ratio-for-intact-stratified-rocks-and-their-relationship-with-uniaxial-compressive-strength/											2.65
Davarpanah et al 2020	Not available	FG Clastic	6.5		Siltstone	DOI not available. Can be found here: https://australiangeomechanics.org/papers/technical-note-determination-of-youngs-modulus-and-poissons-ratio-for-intact-stratified-rocks-and-their-relationship-with-uniaxial-compressive-strength/											6.5
Davarpanah et al 2020	Not available	FG Clastic	5.69		Siltstone	DOI not available. Can be found here: https://australiangeomechanics.org/papers/technical-note-determination-of-youngs-modulus-and-poissons-ratio-for-intact-stratified-rocks-and-their-relationship-with-uniaxial-compressive-strength/											5.69
Davarpanah et al 2020	Not available	FG Clastic	12.58		Siltstone	DOI not available. Can be found here: https://australiangeomechanics.org/papers/technical-note-determination-of-youngs-modulus-and-poissons-ratio-for-intact-stratified-rocks-and-their-relationship-with-uniaxial-compressive-strength/											12.58
Davarpanah et al 2020	Not available	FG Clastic	13.36		Siltstone	DOI not available. Can be found here: https://australiangeomechanics.org/papers/technical-note-determination-of-youngs-modulus-and-poissons-ratio-for-intact-stratified-rocks-and-their-relationship-with-uniaxial-compressive-strength/											13.36
Davarpanah et al 2020	Not available	FG Clastic	36.05		Siltstone	DOI not available. Can be found here: https://australiangeomechanics.org/papers/technical-note-determination-of-youngs-modulus-and-poissons-ratio-for-intact-stratified-rocks-and-their-relationship-with-uniaxial-compressive-strength/											36.05
Davarpanah et al 2020	Not available	FG Clastic	4.34		Siltstone	DOI not available. Can be found here: https://australiangeomechanics.org/papers/technical-note-determination-of-youngs-modulus-and-poissons-ratio-for-intact-stratified-rocks-and-their-relationship-with-uniaxial-compressive-strength/											4.34
Davarpanah et al 2020	Not available	FG Clastic	23.17		Siltstone	DOI not available. Can be found here: https://australiangeomechanics.org/papers/technical-note-determination-of-youngs-modulus-and-poissons-ratio-for-intact-stratified-rocks-and-their-relationship-with-uniaxial-compressive-strength/											23.17
Davarpanah et al 2020	Not available	FG Clastic	18.45		Siltstone	DOI not available. Can be found here: https://australiangeomechanics.org/papers/technical-note-determination-of-youngs-modulus-and-poissons-ratio-for-intact-stratified-rocks-and-their-relationship-with-uniaxial-compressive-strength/											18.45
Davarpanah et al 2020	Not available	FG Clastic	6.18		Siltstone (weathered)	DOI not available. Can be found here: https://australiangeomechanics.org/papers/technical-note-determination-of-youngs-modulus-and-poissons-ratio-for-intact-stratified-rocks-and-their-relationship-with-uniaxial-compressive-strength/											6.18
Davarpanah et al 2020	Not available	FG Clastic	13.79		Siltstone	DOI not available. Can be found here: https://australiangeomechanics.org/papers/technical-note-determination-of-youngs-modulus-and-poissons-ratio-for-intact-stratified-rocks-and-their-relationship-with-uniaxial-compressive-strength/											13.79
Davarpanah et al 2020	Not available	FG Clastic	37.2		Siltstone	DOI not available. Can be found here: https://australiangeomechanics.org/papers/technical-note-determination-of-youngs-modulus-and-poissons-ratio-for-intact-stratified-rocks-and-their-relationship-with-uniaxial-compressive-strength/											37.2
Davarpanah et al 2020	Not available	FG Clastic	23.2		Siltstone	DOI not available. Can be found here: https://australiangeomechanics.org/papers/technical-note-determination-of-youngs-modulus-and-poissons-ratio-for-intact-stratified-rocks-and-their-relationship-with-uniaxial-compressive-strength/											23.2
Davarpanah et al 2020	Not available	FG Clastic	22		Siltstone (slightly weathered)	DOI not available. Can be found here: https://australiangeomechanics.org/papers/technical-note-determination-of-youngs-modulus-and-poissons-ratio-for-intact-stratified-rocks-and-their-relationship-with-uniaxial-compressive-strength/											22
Davarpanah et al 2020	Not available	FG Clastic	16.55		Siltstone (slightly weathered)	DOI not available. Can be found here: https://australiangeomechanics.org/papers/technical-note-determination-of-youngs-modulus-and-poissons-ratio-for-intact-stratified-rocks-and-their-relationship-with-uniaxial-compressive-strength/											16.55
Fitland 2011	Not available	FG Clastic	5.35		Pierre Shale	DOI not available. Can be found here: http://hdl.handle.net/11250/246503											5.35
Malkowski et al., 2018	https://doi.org/10.1016/j.jsm.2018.07.002	FG Clastic	15.06	Average	Mudstone												15.06
Bell 2000	0632052058 9780632052059	Metamorphic	31.2		Slate, normal to cleavage (North Wales)												13.75
Bell 2000	0632052058 9780632052059	Metamorphic	35.5		Schist, normal to schistosity (Aberdeenshire)												20
Bell 2000	0632052058 9780632052059	Metamorphic	46		Schist, parallel to shistosity												32.7
Bell 2000	0632052058 9780632052059	Metamorphic	109.3		Hornfels												25.8
Santi et al., 2000	https://doi.org/10.2113/gseegeosci.6.4.339	Metamorphic	65.57	Mean	Holston Limestone/Tenessee Marble												6.4
Santi et al., 2000	https://doi.org/10.2113/gseegeosci.6.4.339	Metamorphic	53.64	Mean	Dworshak Gneiss												21.3
Santi et al., 2000	https://doi.org/10.2113/gseegeosci.6.4.339	Metamorphic	47.91	Mean	Taconic White Marble												67.4
Santi et al., 2000	https://doi.org/10.2113/gseegeosci.6.4.339	Metamorphic	55.84	Mean	Cherokee Marble												51.1
Santi et al., 2000	https://doi.org/10.2113/gseegeosci.6.4.339	Metamorphic	60.46	Mean	Imperial Danby Marble												16.74
Santi et al., 2000	https://doi.org/10.2113/gseegeosci.6.4.339	Metamorphic	88.38	Mean	Baraboo Quartzite												19.3
Santi et al., 2000	https://doi.org/10.2113/gseegeosci.6.4.339	Metamorphic	20.75	Mean	Luther Falls Schist (perp to schistosity)												39.23
Santi et al., 2000	https://doi.org/10.2113/gseegeosci.6.4.339	Metamorphic	58.19	Mean	Luther Falls Schist (perp to schistosity)												15.3
Davarpanah et al 2020	Not available	Metamorphic	35.04		Quartzite	DOI not available. Can be found here: https://australiangeomechanics.org/papers/technical-note-determination-of-youngs-modulus-and-poissons-ratio-for-intact-stratified-rocks-and-their-relationship-with-uniaxial-compressive-strength/											36.36
Davarpanah et al 2020	Not available	Metamorphic	36.9		Quartzite	DOI not available. Can be found here: https://australiangeomechanics.org/papers/technical-note-determination-of-youngs-modulus-and-poissons-ratio-for-intact-stratified-rocks-and-their-relationship-with-uniaxial-compressive-strength/											31.29
Davarpanah et al 2020	Not available	Metamorphic	36.8		Quartzite	DOI not available. Can be found here: https://australiangeomechanics.org/papers/technical-note-determination-of-youngs-modulus-and-poissons-ratio-for-intact-stratified-rocks-and-their-relationship-with-uniaxial-compressive-strength/											11.09
Davarpanah et al 2020	Not available	Metamorphic	21.75		Quartzite	DOI not available. Can be found here: https://australiangeomechanics.org/papers/technical-note-determination-of-youngs-modulus-and-poissons-ratio-for-intact-stratified-rocks-and-their-relationship-with-uniaxial-compressive-strength/											30.9
Davarpanah et al 2020	Not available	Metamorphic	35.26		Quartzite	DOI not available. Can be found here: https://australiangeomechanics.org/papers/technical-note-determination-of-youngs-modulus-and-poissons-ratio-for-intact-stratified-rocks-and-their-relationship-with-uniaxial-compressive-strength/											19.21
Davarpanah et al 2020	Not available	Metamorphic	34.35		Quartzite	DOI not available. Can be found here: https://australiangeomechanics.org/papers/technical-note-determination-of-youngs-modulus-and-poissons-ratio-for-intact-stratified-rocks-and-their-relationship-with-uniaxial-compressive-strength/											6.17
Davarpanah et al 2020	Not available	Metamorphic	15.94		Quartzite	DOI not available. Can be found here: https://australiangeomechanics.org/papers/technical-note-determination-of-youngs-modulus-and-poissons-ratio-for-intact-stratified-rocks-and-their-relationship-with-uniaxial-compressive-strength/											13.99
Davarpanah et al 2020	Not available	Metamorphic	36.36		Quartzite	DOI not available. Can be found here: https://australiangeomechanics.org/papers/technical-note-determination-of-youngs-modulus-and-poissons-ratio-for-intact-stratified-rocks-and-their-relationship-with-uniaxial-compressive-strength/											20.5
Davarpanah et al 2020	Not available	Metamorphic	29.81		Limestone/marble	DOI not available. Can be found here: https://australiangeomechanics.org/papers/technical-note-determination-of-youngs-modulus-and-poissons-ratio-for-intact-stratified-rocks-and-their-relationship-with-uniaxial-compressive-strength/											20
Davarpanah et al 2020	Not available	Metamorphic	27.73		Limestone/marble	DOI not available. Can be found here: https://australiangeomechanics.org/papers/technical-note-determination-of-youngs-modulus-and-poissons-ratio-for-intact-stratified-rocks-and-their-relationship-with-uniaxial-compressive-strength/
Davarpanah et al 2020	Not available	Metamorphic	28.23		Limestone/marble	DOI not available. Can be found here: https://australiangeomechanics.org/papers/technical-note-determination-of-youngs-modulus-and-poissons-ratio-for-intact-stratified-rocks-and-their-relationship-with-uniaxial-compressive-strength/
Davarpanah et al 2020	Not available	Metamorphic	21.33		Limestone/marble	DOI not available. Can be found here: https://australiangeomechanics.org/papers/technical-note-determination-of-youngs-modulus-and-poissons-ratio-for-intact-stratified-rocks-and-their-relationship-with-uniaxial-compressive-strength/
Davarpanah et al 2020	Not available	Metamorphic	20.43		Limestone/marble	DOI not available. Can be found here: https://australiangeomechanics.org/papers/technical-note-determination-of-youngs-modulus-and-poissons-ratio-for-intact-stratified-rocks-and-their-relationship-with-uniaxial-compressive-strength/
Davarpanah et al 2020	Not available	Metamorphic	52.89		Skarn	DOI not available. Can be found here: https://australiangeomechanics.org/papers/technical-note-determination-of-youngs-modulus-and-poissons-ratio-for-intact-stratified-rocks-and-their-relationship-with-uniaxial-compressive-strength/
Davarpanah et al 2020	Not available	Metamorphic	35.47		Skarn	DOI not available. Can be found here: https://australiangeomechanics.org/papers/technical-note-determination-of-youngs-modulus-and-poissons-ratio-for-intact-stratified-rocks-and-their-relationship-with-uniaxial-compressive-strength/
Malkowski et al., 2018	https://doi.org/10.1016/j.jsm.2018.07.002	Sandstone	13.75	Average
Roche et al 2013	https://doi.org/10.1002/jgrb.50279	Sandstone	20	Mean values
Bell 2000	0632052058 9780632052059	Sandstone	32.7		Fellsand (Rothbury)
Bell 2000	0632052058 9780632052059	Sandstone	25.8		Chatsworth Grit (Stanton in the Peak)
Bell 2000	0632052058 9780632052059	Sandstone	6.4		Bunter Sandstone (Edwinstowe)
Bell 2000	0632052058 9780632052059	Sandstone	21.3		Keuper Waterstones (Edwinstone)
Bell 2000	0632052058 9780632052059	Sandstone	67.4		Horton Flags (Helworth Bridge)
Bell 2000	0632052058 9780632052059	Sandstone	51.1		Bronllwyn Grit (Llanberis)
Santi et al., 2000	https://doi.org/10.2113/gseegeosci.6.4.339	Sandstone	16.74	Mean	Berea Sandstone
Santi et al., 2000	https://doi.org/10.2113/gseegeosci.6.4.339	Sandstone	19.3	Mean	Berea Sandstone
Santi et al., 2000	https://doi.org/10.2113/gseegeosci.6.4.339	Sandstone	39.23	Mean	Crab Orchard Sandstone
Santi et al., 2000	https://doi.org/10.2113/gseegeosci.6.4.339	Sandstone	15.3	Mean	Navajo Sandstone
Xu et al 2016	https://doi.org/10.1155/2016/5967159	Sandstone	36.36	Average	Sandstone	DOI not available. Can be found here: https://australiangeomechanics.org/papers/technical-note-determination-of-youngs-modulus-and-poissons-ratio-for-intact-stratified-rocks-and-their-relationship-with-uniaxial-compressive-strength/
Davarpanah et al 2020	Not available	Sandstone	31.29		Sandstone	DOI not available. Can be found here: https://australiangeomechanics.org/papers/technical-note-determination-of-youngs-modulus-and-poissons-ratio-for-intact-stratified-rocks-and-their-relationship-with-uniaxial-compressive-strength/
Davarpanah et al 2020	Not available	Sandstone	11.09		Sandstone	DOI not available. Can be found here: https://australiangeomechanics.org/papers/technical-note-determination-of-youngs-modulus-and-poissons-ratio-for-intact-stratified-rocks-and-their-relationship-with-uniaxial-compressive-strength/
Davarpanah et al 2020	Not available	Sandstone	30.9		Sandstone	DOI not available. Can be found here: https://australiangeomechanics.org/papers/technical-note-determination-of-youngs-modulus-and-poissons-ratio-for-intact-stratified-rocks-and-their-relationship-with-uniaxial-compressive-strength/
Davarpanah et al 2020	Not available	Sandstone	19.21		Sandstone	DOI not available. Can be found here: https://australiangeomechanics.org/papers/technical-note-determination-of-youngs-modulus-and-poissons-ratio-for-intact-stratified-rocks-and-their-relationship-with-uniaxial-compressive-strength/
Davarpanah et al 2020	Not available	Sandstone	6.17		Sandstone	DOI not available. Can be found here: https://australiangeomechanics.org/papers/technical-note-determination-of-youngs-modulus-and-poissons-ratio-for-intact-stratified-rocks-and-their-relationship-with-uniaxial-compressive-strength/
Fitland 2011	Not available	Sandstone	13.99		Castlegate Sandstone	DOI not available. Can be found here: http://hdl.handle.net/11250/246503
Fitland 2011	Not available	Sandstone	20.5		Berea Sandstone	DOI not available. Can be found here: http://hdl.handle.net/11250/246504
Schultz et al., 2008	https://doi.org/10.1016/j.jsg.2008.08.001	Sandstone	20		Aztec Sandstone
Gundmundsson 2004	https://doi.org/10.1016/j.crte.2003.09.018	Tuff	<1		Tuff
Santi et al., 2000	https://doi.org/10.2113/gseegeosci.6.4.339	Tuff	5.03	Mean	Nevada Tuff
Bell 2000	0632052058 9780632052059	Volcanic	60.6		Mount Sorrel Granite
Bell 2000	0632052058 9780632052059	Volcanic	56.6		Eskdale Granite
Bell 2000	0632052058 9780632052059	Volcanic	41.1		Dalbeattie Granite
Bell 2000	0632052058 9780632052059	Volcanic	56.2		Markfieldite
Bell 2000	0632052058 9780632052059	Volcanic	84.2		Granophyre (Cumbria)
Bell 2000	0632052058 9780632052059	Volcanic	77		Andesite (Somerset)
Bell 2000	0632052058 9780632052059	Volcanic	93.6		Basalt (Derbyshire)
Santi et al., 2000	https://doi.org/10.2113/gseegeosci.6.4.339	Volcanic	46.9	Mean	Barre Granite
Santi et al., 2000	https://doi.org/10.2113/gseegeosci.6.4.340	Volcanic	50.19	Mean	Lower Granite Basalt
Santi et al., 2000	https://doi.org/10.2113/gseegeosci.6.4.341	Volcanic	77.56	Mean	Little Goose Basalt
Santi et al., 2000	https://doi.org/10.2113/gseegeosci.6.4.342	Volcanic	83.83	Mean	John Day Basalt
Santi et al., 2000	https://doi.org/10.2113/gseegeosci.6.4.343	Volcanic	81.9	Mean	Pallisades Diabase
Santi et al., 2000	https://doi.org/10.2113/gseegeosci.6.4.344	Volcanic	97.41	Mean	Coggins Diabase
Santi et al., 2000	https://doi.org/10.2113/gseegeosci.6.4.345	Volcanic	99.34	Mean	French Creek Diabase
Santi et al., 2000	https://doi.org/10.2113/gseegeosci.6.4.346	Volcanic	33.44	Mean	Pikes Peak Granite
Santi et al., 2000	https://doi.org/10.2113/gseegeosci.6.4.347	Volcanic	70.59	Mean	Pikes Peak Granite II
Santi et al., 2000	https://doi.org/10.2113/gseegeosci.6.4.339	Volcanic	61.49	Mean	Barre Granite
Davarpanah et al 2020	Not available	Volcanic	16.69		Monzodiorite	DOI not available. Can be found here: https://australiangeomechanics.org/papers/technical-note-determination-of-youngs-modulus-and-poissons-ratio-for-intact-stratified-rocks-and-their-relationship-with-uniaxial-compressive-strength/
Davarpanah et al 2020	Not available	Volcanic	16.29		Monzodiorite	DOI not available. Can be found here: https://australiangeomechanics.org/papers/technical-note-determination-of-youngs-modulus-and-poissons-ratio-for-intact-stratified-rocks-and-their-relationship-with-uniaxial-compressive-strength/
Davarpanah et al 2020	Not available	Volcanic	14.25		Monzodiorite	DOI not available. Can be found here: https://australiangeomechanics.org/papers/technical-note-determination-of-youngs-modulus-and-poissons-ratio-for-intact-stratified-rocks-and-their-relationship-with-uniaxial-compressive-strength/
Davarpanah et al 2020	Not available	Volcanic	9.12		Monzodiorite	DOI not available. Can be found here: https://australiangeomechanics.org/papers/technical-note-determination-of-youngs-modulus-and-poissons-ratio-for-intact-stratified-rocks-and-their-relationship-with-uniaxial-compressive-strength/
Davarpanah et al 2020	Not available	Volcanic	8.87		Monzodiorite	DOI not available. Can be found here: https://australiangeomechanics.org/papers/technical-note-determination-of-youngs-modulus-and-poissons-ratio-for-intact-stratified-rocks-and-their-relationship-with-uniaxial-compressive-strength/
Davarpanah et al 2020	Not available	Volcanic	7.52		Monzodiorite	DOI not available. Can be found here: https://australiangeomechanics.org/papers/technical-note-determination-of-youngs-modulus-and-poissons-ratio-for-intact-stratified-rocks-and-their-relationship-with-uniaxial-compressive-strength/
Davarpanah et al 2020	Not available	Volcanic	7.32		Monzodiorite	DOI not available. Can be found here: https://australiangeomechanics.org/papers/technical-note-determination-of-youngs-modulus-and-poissons-ratio-for-intact-stratified-rocks-and-their-relationship-with-uniaxial-compressive-strength/
Davarpanah et al 2020	Not available	Volcanic	11.04		Monzodiorite	DOI not available. Can be found here: https://australiangeomechanics.org/papers/technical-note-determination-of-youngs-modulus-and-poissons-ratio-for-intact-stratified-rocks-and-their-relationship-with-uniaxial-compressive-strength/
Davarpanah et al 2020	Not available	Volcanic	18.48		Monzodiorite	DOI not available. Can be found here: https://australiangeomechanics.org/papers/technical-note-determination-of-youngs-modulus-and-poissons-ratio-for-intact-stratified-rocks-and-their-relationship-with-uniaxial-compressive-strength/
Liang et al 2007	https://doi.org/10.1016/j.ijrmms.2006.09.007	Evaporite	5.15	avg of small range	Halite (0 Mpa)
Liang et al 2007	https://doi.org/10.1016/j.ijrmms.2006.09.007	Evaporite	20.4		Halite (5 Mpa)
Liang et al 2007	https://doi.org/10.1016/j.ijrmms.2006.09.007	Evaporite	20.8		Halite (10 Mpa)
Liang et al 2007	https://doi.org/10.1016/j.ijrmms.2006.09.007	Evaporite	25.2		Halite (15 Mpa)
Liang et al 2007	https://doi.org/10.1016/j.ijrmms.2006.09.007	Evaporite	21.75	avg of small range	Anhydrite (0 Mpa)
Liang et al 2007	https://doi.org/10.1016/j.ijrmms.2006.09.007	Evaporite	61.8		Anhydrite (5 Mpa)
Liang et al 2007	https://doi.org/10.1016/j.ijrmms.2006.09.007	Evaporite	17.3		Anhydrite (10 Mpa)
Liang et al 2007	https://doi.org/10.1016/j.ijrmms.2006.09.007	Evaporite	32.7		Anhydrite (15 Mpa)
Liang et al 2007	https://doi.org/10.1016/j.ijrmms.2006.09.007	Evaporite	6.45		Anhydrite & halite (0 Mpa)
Liang et al 2007	https://doi.org/10.1016/j.ijrmms.2006.09.007	Evaporite	10.3		Anhydrite & halite (5 Mpa)
Liang et al 2007	https://doi.org/10.1016/j.ijrmms.2006.09.007	Evaporite	19.6		Anhydrite & halite (10 Mpa)
Liang et al 2007	https://doi.org/10.1016/j.ijrmms.2006.09.007	Evaporite	24.1		Anhydrite & halite (15 Mpa)
Rioseco et al. 2013	Not available	Evaporite	38		Middle Triassic Halite	DOI not available. Can be found here: https://pangea.stanford.edu/ERE/pdf/IGAstandard/SGW/2013/Meneses.pdf
Rioseco et al. 2013	Not available	Evaporite	34		Upper Bunter Halite	DOI not available. Can be found here: https://pangea.stanford.edu/ERE/pdf/IGAstandard/SGW/2013/Meneses.pdf
Bell 2000	0632052058 9780632052059	Evaporite	24.8		Gypsum (Sherburn in Elmet)
Bell 2000	0632052058 9780632052059	Evaporite	63.9		Anhydrite (Sandwith)
Bell 2000	0632052058 9780632052059	Evaporite	7.9		Potash (Loftus)
Santi et al., 2000	https://doi.org/10.2113/gseegeosci.6.4.341	Evaporite	4.89	Mean	Diamond Crystal Rock Salt
Bell 2000	0632052058 9780632052059	Evaportite	3.8		Rock salt (Winsford)
